# Supplementary material for: A Molecular Electron Density Theory Study of the [3+2] Cycloaddition Reaction of Pseudo(mono)radical Azomethine Ylides with Phenyl Vinyl Sulphone
Source: MDPI journal article supplement (doi:10.3390/org3020010), 2022-06-06
Supplement: s1 [file s1]

## Supporting Information

### A Molecular Electron Density Theory Study of the [3+2] Cycloaddition Reaction of *Pseudo(mono)radical* Azomethyne Ylides with Phenyl Vinyl Sulphone

Mar Ríos-Gutiérrez,<sup>1\*</sup> Assem Barakat,<sup>2</sup> and Luis R. Domingo<sup>1</sup>

- 1 Department of Organic Chemistry, University of Valencia, Dr. Moliner 50, 46100 Burjassot, Valencia, Spain. Email: m.mar.rios@uv.es  
2 Department of Chemistry, College of Science, King Saud University, P. O. Box 2455, Riyadh 11451, Saudi Arabia.

#### Index

- S2 Figure S1.**  $\omega$ B97X-D/6-311G(d,p) ELF basin attractor positions together with the most relevant valence basin populations of AY **21**.
- S3 Figure S2.**  $\omega$ B97X-D/6-311G(d,p) geometries of MC.
- S4 Table S1.**  $\omega$ B97X-D/6-311G(d,p) total electronic energies of the stationary points involved in the 32CA reaction of AY **22** with phenyl vinyl sulphone **20**, gas phase and in methanol.
- S5 Table S2.**  $\omega$ B97X-D/6-311G(d,p) total enthalpies, entropies and Gibbs free energies of the stationary points involved in the 32CA reaction of AY **22** with phenyl vinyl sulphone **20**
- S6 Table S3.** most relevant ELF valence basins and their total populations, C–C bond formation distances, IRC values and relative energies, for the structures of the IRC in which there is a relevant chemical change along the *meta/endo* path of the *pmr-type* 32CA reaction between AY **22** with phenyl vinyl sulphone **20**.
- S7 Scheme S1.** Representation of the molecular mechanism of the *pmr-type* 32CA reaction between AY **22** with phenyl vinyl sulphone **20** by Lewis-like structures based on the topological analysis of the ELF along the *meta/endo* reaction path.
- S8**  $\omega$ B97X-D/6-311G(d,p) gas phase Cartesian coordinates of the stationary points involved in the 32CA reaction between AY **22** with phenyl vinyl sulphone **20**.

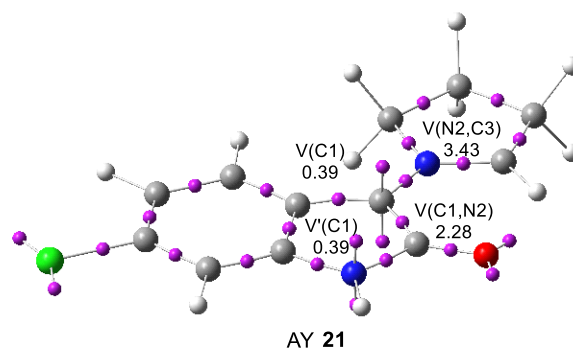

**Figure S1.**  $\omega$ B97X-D/6-311G(d,p) ELF basin attractor positions together with the most relevant valence basin populations of AY 21. Valence basin populations are given in average number of electrons, e.

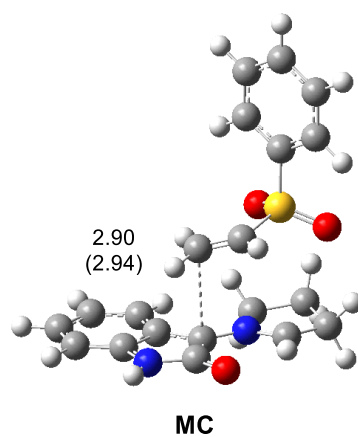

**Figure S2.**  $\omega$ B97X-D/6-311G(d,p) geometries of **MC**. The distance between the two frameworks is given in angstroms, Å. The distance in methanol is given in parentheses.

**Table S1.**  $\omega$ B97X-D/6-311G(d,p) total electronic energies, in a.u., of the stationary points involved in the 32CA reaction of AY **22** with phenyl vinyl sulphone **20**, in gas phase and in methanol.

|              | gas phase    | methanol     |
|--------------|--------------|--------------|
| AY <b>22</b> | -649.158324  | -649.174596  |
| <b>20</b>    | -858.175486  | -858.188771  |
| <b>MC</b>    | -1507.360219 | -1507.379157 |
| <b>TS-on</b> | -1507.345933 | -1507.367662 |
| <b>TS-ox</b> | -1507.335137 | -1507.361476 |
| <b>TS-mn</b> | -1507.349936 | -1507.368977 |
| <b>TS-mx</b> | -1507.338739 | -1507.364747 |
| <b>26</b>    | -1507.416376 | -1507.437909 |
| <b>27</b>    | -1507.416284 | -1507.437853 |
| <b>24</b>    | -1507.418708 | -1507.438884 |
| <b>25</b>    | -1507.422023 | -1507.445182 |

**Table S2.**  $\omega$ B97X-D/6-311G(d,p) total enthalpies (H, in a.u.), entropies (S, in cal·mol<sup>-1</sup>K<sup>-1</sup>) and Gibbs free energies (G, in a.u.), computed at 65 °C in methanol, of the stationary points involved in the 32CA reaction of AY **22** with phenyl vinyl sulphone **20**.

|              | H            | S     | G            |
|--------------|--------------|-------|--------------|
| AY <b>22</b> | -648.937122  | 110.4 | -648.996582  |
| <b>20</b>    | -858.030742  | 104.2 | -858.086842  |
| <b>MC</b>    | -1506.980046 | 181.8 | -1507.077931 |
| <b>TS-on</b> | -1506.969563 | 167.9 | -1507.059964 |
| <b>TS-ox</b> | -1506.963476 | 170.6 | -1507.055326 |
| <b>TS-mn</b> | -1506.970888 | 170.3 | -1507.062566 |
| <b>TS-mx</b> | -1506.966761 | 171.7 | -1507.059178 |
| <b>26</b>    | -1507.035436 | 163.5 | -1507.123440 |
| <b>27</b>    | -1507.035989 | 164.0 | -1507.124286 |
| <b>24</b>    | -1507.036811 | 165.9 | -1507.126138 |
| <b>25</b>    | -1507.043100 | 166.1 | -1507.132528 |

**Table S3.** Most relevant ELF valence basins and their total populations, C–C bond formation distances, IRC values and relative energies, for the structures of the IRC in which there is a relevant chemical change along the *meta/endo* path of the *pmr-type* 32CA reaction between AY **22** with phenyl vinyl sulphone **20**. Distances are given in angstroms, Å, IRC values in a.u, and relative energies with respect to **S1** are given in kcal·mol<sup>-1</sup>.

| Structures | <b>S1</b> | <b>S2</b> | <b>S3</b>  | <b>S4</b> | <b>S5-TS</b> | <b>S6</b> | <b>S7</b>  | <b>S8</b>   | <b>S9</b> | <b>S10</b> |
|------------|-----------|-----------|------------|-----------|--------------|-----------|------------|-------------|-----------|------------|
| Phases     | <i>I</i>  | <i>II</i> | <i>III</i> | <i>IV</i> | <i>IV</i>    | <i>VI</i> | <i>VII</i> | <i>VIII</i> | <i>IX</i> |            |
| d(C1-C4)   | 2.842     | 2.789     | 2.316      | 2.176     | 2.103        | 2.018     | 1.982      | 1.68        | 1.63      | 1.544      |
| d(C3-C5)   | 3.272     | 3.144     | 2.736      | 2.667     | 2.635        | 2.597     | 2.581      | 2.34        | 2.156     | 1.579      |
| IRC        | -8.93     | -6.19     | -1.17      | -0.39     | 0.00         | 0.46      | 0.65       | 2.67        | 3.72      | 22.08      |
| ΔE         | 0.0       | 0.4       | 4.6        | 5.7       | 5.8          | 5.5       | 5.2        | -2.1        | -7.3      | -38.7      |
| V(C1,N2)   | 2.26      | 2.26      | 2.24       | 2.20      | 2.16         | 2.11      | 2.09       | 1.88        | 1.84      | 1.72       |
| V(N2)      |           |           |            |           |              |           | 0.81       | 1.51        | 1.76      | 2.24       |
| V(N2,C3)   | 3.42      | 3.42      | 3.48       | 3.56      | 3.61         | 3.67      | 2.90       | 2.38        | 2.15      | 1.72       |
| V(C1,C)    | 2.43      | 2.43      | 2.40       | 2.33      | 2.3          | 2.25      | 2.24       | 2.12        | 2.11      | 2.09       |
| V(C1,CO)   | 3.35      | 2.95      | 2.58       | 2.46      | 2.39         | 2.34      | 2.31       | 2.17        | 2.15      | 2.14       |
| V(C4,C5)   | 3.43*     | 3.43*     | 3.43       | 3.09      | 2.88         | 2.72      | 2.66       | 2.17        | 2.08      | 1.90       |
| V(C1)      |           | 0.38      | 0.62       | 0.74      | 0.80         |           |            |             |           |            |
| V(C3)      |           |           |            |           |              |           |            | 0.20        |           |            |
| V(C4)      |           |           |            |           | 0.16         |           |            |             |           |            |
| V(C5)      |           |           |            | 0.41      | 0.52         | 0.64      | 0.69       | 1.02        |           |            |
| V(C1,C4)   |           |           |            |           |              | 1.13      | 1.20       | 1.65        | 1.72      | 1.89       |
| V(C3,C5)   |           |           |            |           |              |           |            |             | 1.43      | 1.91       |

Superscript \* refers to the sum of the populations of two V(X,X) and V'(X,X) valence basins in the X–X region.

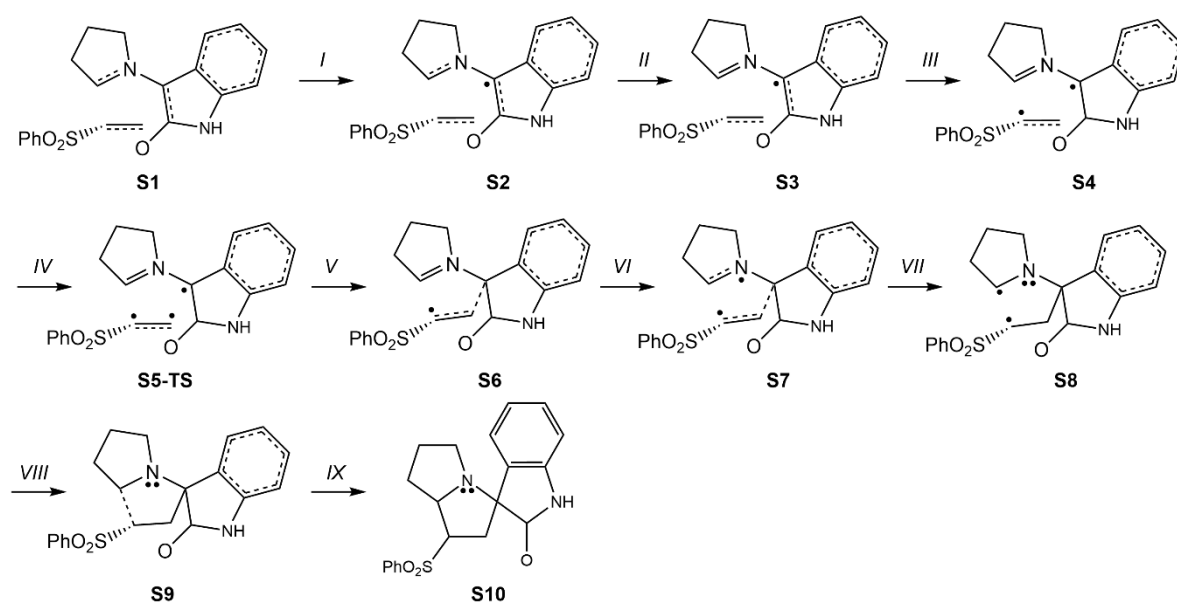

**Scheme S1.** Representation of the molecular mechanism of the *pmr*-type 32CA reaction between AY **22** with phenyl vinyl sulphone **20** by Lewis-like structures based on the topological analysis of the ELF along the *meta/endo* reaction path.

$\omega$ B97X-D/6-311G(d,p) gas phase Cartesian coordinates of the stationary points involved in the *pmr*-type 32CA reaction between AY **22** with phenyl vinyl sulphone **20**.

**20**

|   |             |             |             |
|---|-------------|-------------|-------------|
| C | 2.66802300  | -1.28919100 | 1.18466500  |
| C | 1.89364100  | -0.21858600 | 1.16918600  |
| H | 2.88235200  | -1.82834600 | 0.26790000  |
| H | 3.11263900  | -1.64074400 | 2.10852900  |
| H | 1.63827300  | 0.38583900  | 2.03174700  |
| S | 1.21632200  | 0.38166500  | -0.36532600 |
| O | 1.44387700  | 1.81638100  | -0.40014600 |
| O | 1.67695200  | -0.49030700 | -1.43287700 |
| C | -0.53699700 | 0.11056300  | -0.14449900 |
| C | -1.31801600 | 1.13585900  | 0.37215700  |
| C | -1.07759000 | -1.12444400 | -0.48093600 |
| C | -2.67621800 | 0.91281000  | 0.55967500  |
| H | -0.86685500 | 2.09460400  | 0.59757300  |
| C | -2.43564200 | -1.33451400 | -0.28892400 |
| H | -0.44277500 | -1.89388000 | -0.90336000 |
| C | -3.23089200 | -0.31920000 | 0.23305900  |
| H | -3.30209400 | 1.70424700  | 0.95451400  |
| H | -2.87552300 | -2.28888000 | -0.55295900 |
| H | -4.29164400 | -0.48785800 | 0.37915400  |

**22**

|   |             |             |             |
|---|-------------|-------------|-------------|
| C | 2.64007400  | 0.65288100  | -0.00008300 |
| N | 1.54138900  | -0.05293600 | 0.00000700  |
| C | 0.24976800  | 0.40978200  | -0.00004100 |
| C | -0.99404100 | -0.31965900 | 0.00001200  |
| C | -2.00987600 | 0.67311600  | -0.00006300 |
| C | -3.35584300 | 0.35657000  | -0.00004600 |
| C | -3.72114800 | -0.98726500 | 0.00004500  |
| C | -2.74692200 | -1.97953100 | 0.00011500  |
| C | -1.39188900 | -1.65882100 | 0.00009900  |
| C | -0.02548200 | 1.82306200  | -0.00016100 |
| H | -4.10672100 | 1.13908900  | -0.00010200 |
| H | -0.66936200 | -2.46465600 | 0.00014800  |
| C | 1.81148300  | -1.50630700 | 0.00014800  |
| H | 2.56241100  | 1.73141100  | -0.00022000 |
| H | 1.34084600  | -1.93533600 | -0.88490700 |
| N | -1.41228800 | 1.91942600  | -0.00014300 |
| H | 1.34061900  | -1.93521700 | 0.88513700  |
| O | 0.74626400  | 2.78084000  | -0.00025300 |
| H | -1.88679100 | 2.80487400  | -0.00028900 |
| H | -4.77059500 | -1.25749900 | 0.00005900  |
| H | -3.04289300 | -3.02243800 | 0.00018300  |

|   |            |             |             |
|---|------------|-------------|-------------|
| C | 3.34087800 | -1.63124100 | 0.00035800  |
| C | 3.87163300 | -0.18090500 | -0.00002900 |
| H | 3.68314100 | -2.17795400 | -0.87788100 |
| H | 3.68293100 | -2.17738000 | 0.87903700  |
| H | 4.49029400 | 0.03622800  | -0.87675200 |
| H | 4.49049600 | 0.03661700  | 0.87645300  |

**MC**

|   |             |             |             |
|---|-------------|-------------|-------------|
| C | 0.89966700  | 2.51748900  | 0.50260800  |
| N | 1.55957100  | 1.60838600  | -0.15918200 |
| C | 2.30127700  | 0.57634800  | 0.36799900  |
| C | -0.03739600 | -1.05710100 | 0.86799600  |
| C | -0.99600900 | -0.18397400 | 1.14471600  |
| H | 0.16172500  | -1.37640800 | -0.14862200 |
| C | 3.04220600  | -0.46204100 | -0.30385500 |
| C | 3.62792100  | -1.23877500 | 0.73004000  |
| C | 4.41825300  | -2.34400400 | 0.47221000  |
| C | 4.64197300  | -2.70235800 | -0.85439600 |
| C | 4.07757200  | -1.95999000 | -1.88664400 |
| C | 3.28248900  | -0.84775100 | -1.62496900 |
| C | 2.45800200  | 0.42821500  | 1.79000400  |
| H | 4.85243700  | -2.91468900 | 1.28591100  |
| H | 2.86726800  | -0.29584700 | -2.45752200 |
| C | 1.43847600  | 1.79049300  | -1.62386900 |
| H | 0.92322200  | 2.49224800  | 1.58315100  |
| H | 1.07542800  | 0.85732300  | -2.05206900 |
| N | 3.25736100  | -0.70149500 | 1.94972600  |
| H | 2.43409500  | 2.01262700  | -2.01374300 |
| O | 1.99294800  | 1.08871700  | 2.71900200  |
| H | 3.57597300  | -1.00551500 | 2.85284100  |
| H | 5.25936100  | -3.56376200 | -1.08048900 |
| H | 4.25909000  | -2.24812500 | -2.91582500 |
| C | 0.43158300  | 2.93325600  | -1.78770200 |
| C | 0.27955700  | 3.53983100  | -0.38044700 |
| H | -0.52235500 | 2.52708300  | -2.12123400 |
| H | 0.77286900  | 3.66344400  | -2.52098600 |
| H | -0.76446500 | 3.70485400  | -0.11116000 |
| H | 0.81122400  | 4.49295500  | -0.27099200 |
| H | 0.57195700  | -1.47738500 | 1.65836900  |
| H | -1.24455700 | 0.18552800  | 2.13162900  |
| S | -1.99506100 | 0.47693400  | -0.15773200 |
| O | -2.34099900 | 1.85015000  | 0.18972200  |
| O | -1.34374000 | 0.18186400  | -1.43068900 |
| C | -3.49745900 | -0.48740200 | -0.08050700 |
| C | -3.56557100 | -1.69140700 | -0.77036900 |
| C | -4.55918700 | -0.01868600 | 0.68122200  |
| C | -4.72892900 | -2.44290900 | -0.68995500 |
| H | -2.72628500 | -2.01817800 | -1.37205000 |

|   |             |             |             |
|---|-------------|-------------|-------------|
| C | -5.71798400 | -0.78099800 | 0.75416800  |
| H | -4.47923900 | 0.93588100  | 1.18666800  |
| C | -5.80038900 | -1.98971300 | 0.07312700  |
| H | -4.80164500 | -3.38081400 | -1.22733300 |
| H | -6.55838300 | -0.42703800 | 1.33911300  |
| H | -6.70726900 | -2.58034500 | 0.13170000  |

**TS-mn**

|   |             |             |             |
|---|-------------|-------------|-------------|
| C | 0.68323400  | 2.38446000  | 0.43662900  |
| N | 1.44031000  | 1.51645600  | -0.19241200 |
| C | 1.91159600  | 0.35830200  | 0.39787600  |
| C | 0.09100700  | -0.61200300 | 0.81068900  |
| C | -0.87193000 | 0.34777600  | 1.05200200  |
| H | 0.08411800  | -1.13399200 | -0.14059200 |
| C | 2.73688300  | -0.65454500 | -0.26860200 |
| C | 3.53977600  | -1.23811400 | 0.72902700  |
| C | 4.37724800  | -2.30777800 | 0.47095300  |
| C | 4.41275100  | -2.80942800 | -0.82797500 |
| C | 3.61384500  | -2.26110400 | -1.82468100 |
| C | 2.76219100  | -1.19305100 | -1.54922100 |
| C | 2.40414400  | 0.44933800  | 1.79535300  |
| H | 4.98702300  | -2.74190800 | 1.25490200  |
| H | 2.12664100  | -0.80011300 | -2.33229900 |
| C | 1.41822600  | 1.71616000  | -1.65543400 |
| H | 0.65773200  | 2.38644200  | 1.51320000  |
| H | 0.74379100  | 0.97187500  | -2.08068900 |
| N | 3.31519500  | -0.57967200 | 1.93290400  |
| H | 2.42709900  | 1.58739800  | -2.04695900 |
| O | 2.08305600  | 1.22551300  | 2.67463900  |
| H | 3.78944500  | -0.75873200 | 2.80126700  |
| H | 5.06585200  | -3.64294900 | -1.05847500 |
| H | 3.64472000  | -2.67298000 | -2.82631900 |
| C | 0.86413000  | 3.13518100  | -1.81816400 |
| C | 0.19601800  | 3.46364000  | -0.46724500 |
| H | 0.15569600  | 3.18001900  | -2.64361400 |
| H | 1.67423200  | 3.83738300  | -2.02309300 |
| H | -0.89571500 | 3.43590800  | -0.51134100 |
| H | 0.47995300  | 4.44667700  | -0.08253200 |
| H | 0.47333200  | -1.19241900 | 1.64282300  |
| H | -1.15709000 | 0.67608500  | 2.04244000  |
| S | -2.02841900 | 0.74528200  | -0.17560100 |
| O | -2.65026100 | 2.02568100  | 0.15560300  |
| O | -1.40640100 | 0.55570000  | -1.49046800 |
| C | -3.32554600 | -0.49007000 | -0.05838400 |
| C | -3.23359300 | -1.65017200 | -0.81625700 |
| C | -4.38394800 | -0.27743200 | 0.81515100  |
| C | -4.22069700 | -2.61845700 | -0.68933000 |
| H | -2.41074700 | -1.77321200 | -1.50974200 |

|   |             |             |             |
|---|-------------|-------------|-------------|
| C | -5.36546900 | -1.25256800 | 0.93467700  |
| H | -4.44230400 | 0.64964300  | 1.37247200  |
| C | -5.28201700 | -2.42210900 | 0.18742400  |
| H | -4.16445100 | -3.52486100 | -1.28092400 |
| H | -6.20013100 | -1.09562600 | 1.60797100  |
| H | -6.05128000 | -3.17995300 | 0.28256200  |

**TSA-mx**

|   |             |             |             |
|---|-------------|-------------|-------------|
| C | 0.49583000  | 2.13301700  | 0.45731100  |
| N | 1.56870000  | 1.56519400  | -0.07355700 |
| C | 1.98449600  | 0.30778600  | 0.28815900  |
| C | 0.06420000  | -0.72169800 | -0.22439200 |
| C | -0.82798200 | 0.30476700  | -0.42574500 |
| H | 0.55917900  | -1.18096100 | -1.07109000 |
| C | 3.01196900  | -0.49616900 | -0.37184000 |
| C | 3.50081200  | -1.39111200 | 0.60236000  |
| C | 4.42556100  | -2.37416500 | 0.30104400  |
| C | 4.88060800  | -2.46605100 | -1.01242000 |
| C | 4.40120800  | -1.60551500 | -1.99258500 |
| C | 3.45677700  | -0.62842800 | -1.68243300 |
| C | 2.03398600  | -0.02927100 | 1.73057900  |
| H | 4.78674800  | -3.05200800 | 1.06587000  |
| H | 3.08162300  | 0.01316100  | -2.46960900 |
| C | 1.88305500  | 2.16292500  | -1.37852300 |
| H | 0.18128700  | 1.83634200  | 1.44728600  |
| H | 1.40437800  | 1.55651700  | -2.15691600 |
| N | 2.89381600  | -1.11368000 | 1.81830700  |
| H | 2.96016700  | 2.15929900  | -1.54003100 |
| O | 1.47908100  | 0.50358300  | 2.66715600  |
| H | 3.12072500  | -1.53843400 | 2.70090100  |
| H | 5.61170200  | -3.22324900 | -1.27047400 |
| H | 4.75800800  | -1.69758500 | -3.01150000 |
| C | 1.27191600  | 3.56157000  | -1.27861900 |
| C | 0.15406500  | 3.41610900  | -0.22749300 |
| H | 0.90635100  | 3.91100500  | -2.24384400 |
| H | 2.02771300  | 4.26773800  | -0.92963700 |
| H | -0.84759100 | 3.34126400  | -0.65637200 |
| H | 0.13002200  | 4.24815400  | 0.47950800  |
| H | -0.01773900 | -1.32782900 | 0.67110400  |
| H | -0.99678000 | 0.73941700  | -1.40560000 |
| S | -2.18564800 | 0.56946300  | 0.64889400  |
| O | -1.84277000 | 0.07938300  | 1.97562400  |
| O | -2.64577400 | 1.94230500  | 0.45360100  |
| C | -3.47829400 | -0.49526700 | 0.00362500  |
| C | -3.54975200 | -1.81212800 | 0.43961500  |
| C | -4.36988900 | 0.00863200  | -0.93330900 |
| C | -4.53308200 | -2.64111700 | -0.08226800 |
| H | -2.85626800 | -2.16726200 | 1.19230900  |

|   |             |             |             |
|---|-------------|-------------|-------------|
| C | -5.34988000 | -0.83000000 | -1.44958400 |
| H | -4.30514600 | 1.04874400  | -1.22880400 |
| C | -5.42841800 | -2.15214700 | -1.02803500 |
| H | -4.60546000 | -3.66857100 | 0.25485700  |
| H | -6.05751000 | -0.44757400 | -2.17598700 |
| H | -6.19606200 | -2.80278500 | -1.43126000 |

**TS-on**

|   |             |             |             |
|---|-------------|-------------|-------------|
| C | -1.17447500 | 2.72639800  | 0.66799400  |
| N | -1.66548800 | 1.73081900  | -0.08601400 |
| C | -1.90196100 | 0.48936400  | 0.37567300  |
| C | 0.66112200  | 0.50773200  | 1.13426600  |
| C | 0.79374500  | 1.86799000  | 1.10024800  |
| H | 1.25020500  | 2.34005700  | 0.23687800  |
| H | 0.50488900  | -0.06211300 | 2.03965300  |
| C | -2.33524700 | -0.69329100 | -0.35364900 |
| C | -2.68360900 | -1.64478400 | 0.62559400  |
| C | -3.09627200 | -2.92335200 | 0.30388400  |
| C | -3.17377700 | -3.26309300 | -1.04267800 |
| C | -2.84079200 | -2.34041500 | -2.02815100 |
| C | -2.41645600 | -1.05921200 | -1.69382300 |
| C | -2.11615700 | 0.23253600  | 1.81498200  |
| H | -3.34733200 | -3.63903700 | 1.07812700  |
| H | -2.14545900 | -0.37426800 | -2.48397300 |
| C | -1.61756200 | 2.05346000  | -1.52753100 |
| H | -1.42296300 | 2.71829900  | 1.71825600  |
| H | -1.06376500 | 1.27425400  | -2.04415900 |
| N | -2.53190800 | -1.08088200 | 1.88400100  |
| H | -2.64559100 | 2.10225200  | -1.89562900 |
| O | -1.99408400 | 0.97812200  | 2.77487600  |
| H | -2.74688300 | -1.52482300 | 2.75946400  |
| H | -3.49387400 | -4.25977700 | -1.32338500 |
| H | -2.90036000 | -2.62380300 | -3.07210400 |
| C | -0.88232100 | 3.39420400  | -1.58239300 |
| C | -1.00645000 | 3.96266500  | -0.16159200 |
| H | 0.16621900  | 3.21060400  | -1.82374800 |
| H | -1.29508300 | 4.05552800  | -2.34388400 |
| H | -0.13227300 | 4.54322700  | 0.14150900  |
| H | -1.88137400 | 4.61553800  | -0.05714000 |
| H | 0.85593200  | 2.40989800  | 2.03520000  |
| S | 1.13568900  | -0.47026700 | -0.23856900 |
| O | 0.86279900  | 0.28720300  | -1.46272300 |
| O | 0.61714800  | -1.81667900 | -0.05428100 |
| C | 2.92339900  | -0.58368700 | -0.11597600 |
| C | 3.71690900  | 0.35200800  | -0.76650900 |
| C | 3.48065800  | -1.59879200 | 0.65054800  |
| C | 5.09712300  | 0.27144500  | -0.63826500 |
| H | 3.25265900  | 1.11229500  | -1.38252800 |

|   |            |             |             |
|---|------------|-------------|-------------|
| C | 4.86211000 | -1.66964600 | 0.77313100  |
| H | 2.83622300 | -2.33077000 | 1.12220400  |
| C | 5.66809100 | -0.73437300 | 0.13380000  |
| H | 5.72821000 | 0.99054200  | -1.14751000 |
| H | 5.30986800 | -2.46071800 | 1.36324800  |
| H | 6.74613300 | -0.79460500 | 0.23042000  |

**TS-ox**

|   |             |             |             |
|---|-------------|-------------|-------------|
| C | 1.86218800  | -2.44095500 | 0.19997400  |
| N | 2.31843000  | -1.26140400 | -0.25507500 |
| C | 1.92505300  | -0.07438700 | 0.24790500  |
| C | -0.46041100 | -0.81035000 | -0.35935100 |
| C | -0.19524500 | -2.14279000 | -0.51284100 |
| H | 0.07154400  | -2.51998300 | -1.49498800 |
| C | 2.06473500  | 1.25083200  | -0.32851800 |
| C | 1.86945000  | 2.15459800  | 0.73738300  |
| C | 1.82456800  | 3.52150200  | 0.53554300  |
| C | 1.99189000  | 4.00051900  | -0.76135900 |
| C | 2.18983000  | 3.12741000  | -1.82571800 |
| C | 2.21745800  | 1.75047300  | -1.61840200 |
| C | 1.72148800  | 0.08611600  | 1.70332900  |
| H | 1.66209200  | 4.19939600  | 1.36511700  |
| H | 2.34415800  | 1.08931100  | -2.46660300 |
| C | 2.88513600  | -1.41231100 | -1.60057300 |
| H | 1.55141500  | -2.49042800 | 1.23328900  |
| H | 2.09269200  | -1.22295300 | -2.33465000 |
| N | 1.74637300  | 1.45242800  | 1.92485700  |
| H | 3.68225600  | -0.68526300 | -1.74936500 |
| O | 1.60820000  | -0.76896600 | 2.55894700  |
| H | 1.34001100  | 1.83233900  | 2.76320700  |
| H | 1.96418900  | 5.06908200  | -0.94084700 |
| H | 2.31455400  | 3.51932900  | -2.82820000 |
| C | 3.35779200  | -2.86633500 | -1.61931700 |
| C | 2.47253200  | -3.57513000 | -0.57225500 |
| H | 3.27554500  | -3.30427000 | -2.61397900 |
| H | 4.40555300  | -2.91455300 | -1.31758700 |
| H | 1.69406700  | -4.18913300 | -1.03658500 |
| H | 3.05422300  | -4.23683700 | 0.07334700  |
| H | -0.62970800 | -2.85244900 | 0.18205700  |
| H | -0.34570300 | -0.06911300 | -1.14040500 |
| S | -1.53182700 | -0.27912300 | 0.93757100  |
| O | -1.70897300 | -1.37958200 | 1.87298600  |
| O | -1.12458000 | 1.04258900  | 1.39614900  |
| C | -3.08576200 | -0.04906100 | 0.06904400  |
| C | -3.96595100 | -1.11735100 | -0.04188300 |
| C | -3.36942000 | 1.18903900  | -0.49206000 |
| C | -5.15636100 | -0.93842300 | -0.73323200 |
| H | -3.72314900 | -2.06302300 | 0.42764500  |

|   |             |             |             |
|---|-------------|-------------|-------------|
| C | -4.56181200 | 1.35576000  | -1.18479600 |
| H | -2.67140600 | 2.00774400  | -0.36443600 |
| C | -5.45113300 | 0.29411700  | -1.30684500 |
| H | -5.85789000 | -1.76001300 | -0.81959400 |
| H | -4.79975600 | 2.31812100  | -1.62278500 |
| H | -6.38239700 | 0.42951400  | -1.84507000 |

## 24

|   |             |             |             |
|---|-------------|-------------|-------------|
| C | 0.41522500  | 1.42677900  | -0.06891400 |
| N | -0.83967200 | 1.00661700  | 0.50421100  |
| C | -1.71432600 | 0.46194600  | -0.49682100 |
| C | -0.71506900 | -0.08842300 | -1.55858100 |
| C | 0.69768500  | 0.29981400  | -1.06176000 |
| H | -0.82586100 | -1.16387000 | -1.69739700 |
| H | 1.33673800  | 0.61765600  | -1.88620900 |
| C | -2.70552200 | -0.52974800 | 0.05590700  |
| C | -3.99781500 | -0.11067300 | -0.25190300 |
| C | -5.10898100 | -0.83370500 | 0.14063400  |
| C | -4.88762200 | -2.00410800 | 0.86826900  |
| C | -3.60236300 | -2.42384100 | 1.19163800  |
| C | -2.49242500 | -1.67984500 | 0.78683400  |
| C | -2.64697200 | 1.52638800  | -1.14448200 |
| H | -6.11381200 | -0.50700100 | -0.10088500 |
| H | -1.47963600 | -1.97926500 | 1.03710000  |
| C | -1.23128600 | 1.93393800  | 1.54309600  |
| H | 0.31408700  | 2.34527600  | -0.67634300 |
| H | -1.78601300 | 1.41387000  | 2.32837000  |
| N | -3.93720400 | 1.09739300  | -0.96388800 |
| H | -1.86169200 | 2.75169000  | 1.16069900  |
| O | -2.30097200 | 2.54812200  | -1.68883500 |
| H | -4.73144000 | 1.63360300  | -1.27158600 |
| H | -5.73959400 | -2.59280700 | 1.18924300  |
| H | -3.46186200 | -3.33339300 | 1.76328400  |
| C | 0.13467000  | 2.49199100  | 2.03012200  |
| C | 1.20659500  | 1.75694800  | 1.19110100  |
| H | 0.28629400  | 2.33424200  | 3.09845800  |
| H | 0.18214200  | 3.56769300  | 1.84712100  |
| H | 1.49637300  | 0.83639700  | 1.69536600  |
| H | 2.09526600  | 2.36279100  | 1.00791300  |
| H | -0.89046600 | 0.38830800  | -2.52345000 |
| S | 1.54544600  | -1.18272300 | -0.43328700 |
| O | 1.57567600  | -2.11390300 | -1.55361500 |
| O | 0.98830200  | -1.60149400 | 0.84549500  |
| C | 3.22500200  | -0.62811200 | -0.14739200 |
| C | 3.72085000  | -0.59855500 | 1.14773800  |
| C | 4.01319100  | -0.27459400 | -1.23643900 |
| C | 5.02990100  | -0.18392000 | 1.35748600  |
| H | 3.08595300  | -0.90800500 | 1.96901700  |

|   |            |             |             |
|---|------------|-------------|-------------|
| C | 5.31586900 | 0.14873100  | -1.01499100 |
| H | 3.62049700 | -0.35120500 | -2.24370200 |
| C | 5.82117200 | 0.19656000  | 0.28030300  |
| H | 5.43161600 | -0.16048300 | 2.36350300  |
| H | 5.94079100 | 0.42962500  | -1.85433800 |
| H | 6.84090500 | 0.52316100  | 0.44874800  |

25

|   |             |             |             |
|---|-------------|-------------|-------------|
| C | -0.23372300 | -2.16177100 | -0.05480600 |
| N | -1.56507000 | -1.64682500 | 0.30709900  |
| C | -1.50453400 | -0.24511900 | 0.70707000  |
| C | 0.00031200  | 0.00910500  | 0.91126900  |
| C | 0.62224500  | -0.89252200 | -0.14780900 |
| H | 0.28423200  | -0.34653700 | 1.90616800  |
| H | 0.57249800  | -0.45218900 | -1.14785300 |
| C | -2.18098500 | 0.76724400  | -0.20184800 |
| C | -3.21916000 | 1.38247400  | 0.50246500  |
| C | -4.01864700 | 2.35547700  | -0.07092600 |
| C | -3.75496700 | 2.71785700  | -1.39087900 |
| C | -2.72000500 | 2.12682700  | -2.10380600 |
| C | -1.92689700 | 1.14653200  | -1.50586700 |
| C | -2.27524400 | -0.04336900 | 2.04366200  |
| H | -4.82112500 | 2.82438500  | 0.48655200  |
| H | -1.12037500 | 0.69000200  | -2.06834300 |
| C | -2.55103600 | -2.10809800 | -0.66601200 |
| H | 0.16280200  | -2.79339600 | 0.74626500  |
| H | -3.32183500 | -1.35230500 | -0.82885800 |
| N | -3.27590000 | 0.87145500  | 1.79980800  |
| H | -3.04583600 | -3.01175400 | -0.29204200 |
| O | -2.04510500 | -0.57874100 | 3.09379000  |
| H | -3.90972400 | 1.17805800  | 2.51867900  |
| H | -4.36789000 | 3.47666100  | -1.86359500 |
| H | -2.52780700 | 2.42646600  | -3.12686600 |
| C | -1.74220500 | -2.42683900 | -1.92761400 |
| C | -0.42619500 | -2.96157200 | -1.35273400 |
| H | -1.57228500 | -1.51030700 | -2.50057200 |
| H | -2.23872600 | -3.14269800 | -2.58505200 |
| H | 0.42989400  | -2.85621700 | -2.02034100 |
| H | -0.52691300 | -4.02275500 | -1.11209600 |
| H | 0.26125600  | 1.06214800  | 0.80826300  |
| S | 2.37359900  | -1.23972800 | 0.11313200  |
| O | 2.54815500  | -1.74101800 | 1.46747400  |
| O | 2.82778700  | -2.00881400 | -1.03738700 |
| C | 3.11389200  | 0.38537300  | 0.02435400  |
| C | 3.31225400  | 1.10329700  | 1.19665400  |
| C | 3.44734700  | 0.90689400  | -1.21920600 |
| C | 3.85123700  | 2.38056600  | 1.11564900  |
| H | 3.06211700  | 0.65390100  | 2.15015600  |

|   |            |            |             |
|---|------------|------------|-------------|
| C | 3.98416900 | 2.18545800 | -1.28712800 |
| H | 3.30906200 | 0.30628900 | -2.11043600 |
| C | 4.18126600 | 2.92012200 | -0.12275400 |
| H | 4.01882800 | 2.95224300 | 2.02066400  |
| H | 4.25683500 | 2.60512700 | -2.24815500 |
| H | 4.60274400 | 3.91710200 | -0.18042200 |

## 26

|   |             |             |             |
|---|-------------|-------------|-------------|
| C | -0.23310000 | 2.55671400  | 0.57339600  |
| N | -1.35049900 | 1.79304700  | 0.00469600  |
| C | -1.24363700 | 0.43263100  | 0.51700700  |
| C | 0.29227100  | 0.15232100  | 0.71455800  |
| C | 0.93264700  | 1.54921900  | 0.73725200  |
| H | 1.63419600  | 1.66677600  | -0.09147600 |
| H | 0.46017500  | -0.39976800 | 1.63991300  |
| C | -2.18495200 | -0.56086200 | -0.14536000 |
| C | -3.23583700 | -0.83017400 | 0.73562600  |
| C | -4.29232400 | -1.65796000 | 0.40532700  |
| C | -4.28533400 | -2.24137400 | -0.85890600 |
| C | -3.24734000 | -1.99810600 | -1.74704700 |
| C | -2.19292500 | -1.15679700 | -1.39486100 |
| C | -1.84053000 | 0.50691100  | 1.96180400  |
| H | -5.09504000 | -1.84905900 | 1.10785900  |
| H | -1.38322300 | -0.99530100 | -2.09367900 |
| C | -1.43526900 | 2.04590300  | -1.44893800 |
| H | -0.50655600 | 2.94917300  | 1.55267300  |
| H | -1.37595000 | 1.12978500  | -2.03191400 |
| N | -3.02844000 | -0.16386300 | 1.94408600  |
| H | -2.39478900 | 2.52382800  | -1.66984500 |
| O | -1.34712700 | 1.05590000  | 2.91698000  |
| H | -3.60326100 | -0.25177800 | 2.76519900  |
| H | -5.09865300 | -2.89820300 | -1.14554700 |
| H | -3.24728400 | -2.47038700 | -2.72165500 |
| C | -0.26139400 | 2.97480300  | -1.77629900 |
| C | 0.02774000  | 3.66482400  | -0.44163600 |
| H | 0.59603700  | 2.37546000  | -2.09332000 |
| H | -0.49676800 | 3.67643600  | -2.57820600 |
| H | 1.04172700  | 4.06389600  | -0.36566700 |
| H | -0.67183800 | 4.48869900  | -0.27427200 |
| S | 1.03898600  | -0.91085400 | -0.54516200 |
| O | 0.87897400  | -0.27310000 | -1.85073800 |
| O | 0.57917700  | -2.27279700 | -0.32524400 |
| H | 1.48221500  | 1.71042200  | 1.66408000  |
| C | 2.78010600  | -0.85144200 | -0.13139700 |
| C | 3.63860300  | -0.07308300 | -0.89525800 |
| C | 3.23606500  | -1.59837900 | 0.94791200  |
| C | 4.98601600  | -0.03478600 | -0.56014500 |
| H | 3.24944000  | 0.47435000  | -1.74532900 |

|   |            |             |             |
|---|------------|-------------|-------------|
| C | 4.58315800 | -1.54697300 | 1.27739800  |
| H | 2.54917500 | -2.22506700 | 1.50439000  |
| C | 5.45425800 | -0.76466400 | 0.52620900  |
| H | 5.67050400 | 0.56316700  | -1.15001500 |
| H | 4.95493600 | -2.12507200 | 2.11492800  |
| H | 6.50622600 | -0.73036300 | 0.78515900  |

## 27

|   |             |             |             |
|---|-------------|-------------|-------------|
| C | 3.11346300  | -0.74381300 | -0.38987100 |
| N | 2.29015600  | 0.44000900  | -0.59616500 |
| C | 1.05781600  | 0.27776500  | 0.13619600  |
| C | 0.73944300  | -1.16013500 | -0.36211900 |
| C | 2.09807100  | -1.89709100 | -0.41577600 |
| H | 2.23043600  | -2.54855800 | 0.44805800  |
| H | 0.34701100  | -1.04849300 | -1.37478000 |
| C | 0.01511000  | 1.32321700  | -0.15617500 |
| C | -0.35426900 | 1.94912000  | 1.03417800  |
| C | -1.31102900 | 2.94794200  | 1.06069100  |
| C | -1.90294100 | 3.30732800  | -0.14966400 |
| C | -1.54542300 | 2.68876400  | -1.34170100 |
| C | -0.57251800 | 1.68914600  | -1.34818200 |
| C | 1.24844100  | 0.42530100  | 1.68021400  |
| H | -1.59480000 | 3.43305400  | 1.98731700  |
| H | -0.27928700 | 1.20420600  | -2.27289400 |
| C | 3.17922400  | 1.57767100  | -0.55522700 |
| H | 3.58533300  | -0.71984200 | 0.60295000  |
| H | 2.72351800  | 2.45068300  | -1.02691000 |
| N | 0.36435800  | 1.39730700  | 2.09501700  |
| H | 3.46871100  | 1.84718700  | 0.47373200  |
| O | 2.06965500  | -0.11981300 | 2.36958100  |
| H | 0.33087600  | 1.71039800  | 3.05083200  |
| H | -2.65792900 | 4.08535300  | -0.15658700 |
| H | -2.02206800 | 2.98558300  | -2.26789600 |
| C | 4.40803400  | 1.02682100  | -1.33624600 |
| C | 4.18498900  | -0.51017800 | -1.44599800 |
| H | 4.48494100  | 1.48305800  | -2.32407700 |
| H | 5.33033800  | 1.25357800  | -0.79861200 |
| H | 3.79868900  | -0.77519500 | -2.43358800 |
| H | 5.09940500  | -1.07757500 | -1.26574200 |
| H | 2.15844700  | -2.50813600 | -1.31628200 |
| S | -0.55247000 | -2.10611000 | 0.48145400  |
| O | -0.44297100 | -1.92783700 | 1.92012900  |
| O | -0.52213700 | -3.43224000 | -0.11693100 |
| C | -2.04976600 | -1.29160300 | -0.06098200 |
| C | -2.66320800 | -0.37446600 | 0.77890500  |
| C | -2.53945400 | -1.56150300 | -1.33255300 |
| C | -3.78841000 | 0.30023800  | 0.32548300  |
| H | -2.25820000 | -0.20129600 | 1.76823300  |

|   |             |             |             |
|---|-------------|-------------|-------------|
| C | -3.66411400 | -0.88014500 | -1.77570600 |
| H | -2.05475800 | -2.30712900 | -1.95190700 |
| C | -4.28241200 | 0.05225300  | -0.94925800 |
| H | -4.27462000 | 1.02514900  | 0.96695300  |
| H | -4.06210400 | -1.08134100 | -2.76328400 |
| H | -5.15867000 | 0.58520300  | -1.30024400 |
